# Supplementary material for: Effect of Surfactants on the Binding Properties of a Molecularly Imprinted Polymer
Source: MDPI journal article supplement (doi:10.3390/polym14235210), 2022-11-30
Supplement: s1 [file s1]

## Supplementary materials

**Table S1:** Tween 20, binding affinity values ( $K_{eq}$ )  $\pm$  1 standard error (in  $10^3 \text{ mol l}^{-1}$ ) measured for 2,4,5-T on MIP & NIP and for 2,4-D on MIP

| 2,4,5-T<br>(on MIP)  | Molar fraction of MeCN in water |            |            |             |             |
|----------------------|---------------------------------|------------|------------|-------------|-------------|
|                      | 0.00                            | 0.24       | 0.42       | 0.66        | 0.81        |
| no Tween 20          | 80 $\pm$ 9                      | 61 $\pm$ 5 | 78 $\pm$ 5 | 189 $\pm$ 3 | 830 $\pm$ 8 |
| Tween 20<br>0.81 mM  | 77 $\pm$ 1                      | 47 $\pm$ 3 | 69 $\pm$ 1 | 184 $\pm$ 1 | 749 $\pm$ 2 |
| Tween 20<br>4.10 mM  | 61 $\pm$ 1                      | 44 $\pm$ 3 | 57 $\pm$ 1 | 170 $\pm$ 1 | 709 $\pm$ 3 |
| Tween 20<br>8.10 mM  | 56 $\pm$ 1                      | 41 $\pm$ 1 | 46 $\pm$ 3 | 159 $\pm$ 1 | 649 $\pm$ 4 |
| Tween 20<br>20.40 mM | 53 $\pm$ 3                      | 36 $\pm$ 2 | 43 $\pm$ 3 | 152 $\pm$ 1 | 622 $\pm$ 4 |

  

| 2,4-D<br>(on MIP)    | Molar fraction of MeCN in water |            |            |            |              |
|----------------------|---------------------------------|------------|------------|------------|--------------|
|                      | 0.00                            | 0.24       | 0.42       | 0.66       | 0.81         |
| no Tween 20          | 56 $\pm$ 3                      | 38 $\pm$ 2 | 47 $\pm$ 3 | 97 $\pm$ 2 | 431 $\pm$ 25 |
| Tween 20<br>0.81 mM  | 52 $\pm$ 1                      | 30 $\pm$ 1 | 42 $\pm$ 1 | 94 $\pm$ 1 | 364 $\pm$ 3  |
| Tween 20<br>4.10 mM  | 47 $\pm$ 1                      | 28 $\pm$ 1 | 39 $\pm$ 1 | 90 $\pm$ 1 | 358 $\pm$ 1  |
| Tween 20<br>8.10 mM  | 42 $\pm$ 1                      | 25 $\pm$ 2 | 32 $\pm$ 1 | 84 $\pm$ 1 | 351 $\pm$ 1  |
| Tween 20<br>20.40 mM | 37 $\pm$ 1                      | 23 $\pm$ 1 | 28 $\pm$ 1 | 79 $\pm$ 1 | 324 $\pm$ 2  |

  

| 2,4,5-T<br>(on NIP)  | Molar fraction of MeCN in water |            |             |             |             |
|----------------------|---------------------------------|------------|-------------|-------------|-------------|
|                      | 0.00                            | 0.24       | 0.42        | 0.66        | 0.81        |
| no Tween 20          | 39 $\pm$ 7                      | 14 $\pm$ 3 | 25 $\pm$ 12 | 101 $\pm$ 8 | 398 $\pm$ 7 |
| Tween 20<br>0.81 mM  | 21 $\pm$ 1                      | 10 $\pm$ 1 | 20 $\pm$ 1  | 70 $\pm$ 1  | 264 $\pm$ 1 |
| Tween 20<br>4.10 mM  | 15 $\pm$ 1                      | 8 $\pm$ 3  | 17 $\pm$ 2  | 68 $\pm$ 4  | 254 $\pm$ 6 |
| Tween 20<br>8.10 mM  | 15 $\pm$ 1                      | 8 $\pm$ 2  | 15 $\pm$ 1  | 66 $\pm$ 1  | 255 $\pm$ 4 |
| Tween 20<br>20.40 mM | 15 $\pm$ 1                      | 7 $\pm$ 1  | 13 $\pm$ 1  | 63 $\pm$ 1  | 250 $\pm$ 6 |

**Table S2:** SDS, binding affinity values ( $K_{eq}$ )  $\pm$  1 standard error (in  $10^3 \text{ mol l}^{-1}$ ) measured for 2,4,5-T on MIP & NIP and for 2,4-D on MIP

| <b>2,4,5-T<br/>(on MIP)</b> | <b>Molar fraction of MeCN in water</b> |             |             |             |             |
|-----------------------------|----------------------------------------|-------------|-------------|-------------|-------------|
|                             | <b>0.00</b>                            | <b>0.24</b> | <b>0.42</b> | <b>0.66</b> | <b>0.81</b> |
| <b>no SDS</b>               | 80 $\pm$ 9                             | 61 $\pm$ 5  | 78 $\pm$ 5  | 189 $\pm$ 3 | 830 $\pm$ 8 |
| <b>SDS<br/>1.73 mM</b>      | 30 $\pm$ 1                             | 6 $\pm$ 1   | 9 $\pm$ 1   | 31 $\pm$ 1  | 128 $\pm$ 2 |
| <b>SDS<br/>3.46 mM</b>      | 21 $\pm$ 5                             | 7 $\pm$ 1   | 17 $\pm$ 1  | 27 $\pm$ 1  | 105 $\pm$ 2 |
| <b>SDS<br/>5.19 mM</b>      | 13 $\pm$ 2                             | 5 $\pm$ 1   | 10 $\pm$ 1  | 24 $\pm$ 1  | 90 $\pm$ 1  |
| <b>SDS<br/>6.92 mM</b>      | 9 $\pm$ 1                              | 4 $\pm$ 1   | 8 $\pm$ 4   | 20 $\pm$ 1  | 75 $\pm$ 2  |

  

| <b>2,4-D<br/>(on MIP)</b> | <b>Molar fraction of MeCN in water</b> |             |             |             |              |
|---------------------------|----------------------------------------|-------------|-------------|-------------|--------------|
|                           | <b>0.00</b>                            | <b>0.24</b> | <b>0.42</b> | <b>0.66</b> | <b>0.81</b>  |
| <b>no SDS</b>             | 56 $\pm$ 3                             | 38 $\pm$ 2  | 47 $\pm$ 3  | 97 $\pm$ 2  | 431 $\pm$ 25 |
| <b>SDS<br/>1.73 mM</b>    | 16 $\pm$ 1                             | 7 $\pm$ 1   | 14 $\pm$ 1  | 19 $\pm$ 1  | 70 $\pm$ 2   |
| <b>SDS<br/>3.46 mM</b>    | 13 $\pm$ 1                             | 5 $\pm$ 1   | 9 $\pm$ 1   | 14 $\pm$ 1  | 57 $\pm$ 1   |
| <b>SDS<br/>5.19 mM</b>    | 8 $\pm$ 1                              | 4 $\pm$ 2   | 6 $\pm$ 1   | 12 $\pm$ 1  | 56 $\pm$ 1   |
| <b>SDS<br/>6.92 mM</b>    | 7 $\pm$ 1                              | 3 $\pm$ 1   | 4 $\pm$ 1   | 10 $\pm$ 1  | 50 $\pm$ 1   |

  

| <b>2,4,5-T<br/>(on NIP)</b> | <b>Molar fraction of MeCN in water</b> |             |             |             |             |
|-----------------------------|----------------------------------------|-------------|-------------|-------------|-------------|
|                             | <b>0.00</b>                            | <b>0.24</b> | <b>0.42</b> | <b>0.66</b> | <b>0.81</b> |
| <b>no SDS</b>               | 39 $\pm$ 7                             | 14 $\pm$ 3  | 25 $\pm$ 12 | 101 $\pm$ 8 | 398 $\pm$ 7 |
| <b>SDS<br/>1.73 mM</b>      | 3 $\pm$ 1                              | 2 $\pm$ 1   | 7 $\pm$ 1   | 10 $\pm$ 1  | 59 $\pm$ 1  |
| <b>SDS<br/>3.46 mM</b>      | 2 $\pm$ 1                              | 1 $\pm$ 1   | 3 $\pm$ 1   | 8 $\pm$ 1   | 50 $\pm$ 6  |
| <b>SDS<br/>5.19 mM</b>      | 1 $\pm$ 1                              | 1 $\pm$ 1   | 2 $\pm$ 1   | 7 $\pm$ 1   | 52 $\pm$ 1  |
| <b>SDS<br/>6.92 mM</b>      | 2 $\pm$ 1                              | 1 $\pm$ 1   | 2 $\pm$ 1   | 5 $\pm$ 1   | 52 $\pm$ 2  |

**Table S3:** CTAB, binding affinity values ( $K_{eq}$ )  $\pm$  1 standard error (in  $10^3 \text{ mol l}^{-1}$ ) measured for 2,4,5-T on MIP & NIP and for 2,4-D on MIP

| 2,4,5-T<br>(on MIP) | Molar fraction of MeCN in water |            |            |             |              |
|---------------------|---------------------------------|------------|------------|-------------|--------------|
|                     | 0.00                            | 0.24       | 0.42       | 0.66        | 0.81         |
| no CTAB             | 80 $\pm$ 9                      | 61 $\pm$ 5 | 78 $\pm$ 5 | 189 $\pm$ 3 | 830 $\pm$ 8  |
| CTAB<br>1.37 mM     | 21 $\pm$ 1                      | 9 $\pm$ 1  | 17 $\pm$ 1 | 20 $\pm$ 3  | 299 $\pm$ 2  |
| CTAB<br>2.74 mM     | 22 $\pm$ 4                      | 9 $\pm$ 1  | 12 $\pm$ 1 | 38 $\pm$ 2  | 187 $\pm$ 5  |
| CTAB<br>4.12 mM     | 19 $\pm$ 1                      | 6 $\pm$ 1  | 9 $\pm$ 2  | 34 $\pm$ 2  | 182 $\pm$ 12 |
| CTAB<br>5.90 mM     | 16 $\pm$ 1                      | 6 $\pm$ 1  | 8 $\pm$ 1  | 26 $\pm$ 1  | 153 $\pm$ 3  |

  

| 2,4-D<br>(on MIP) | Molar fraction of MeCN in water |            |            |            |               |
|-------------------|---------------------------------|------------|------------|------------|---------------|
|                   | 0.00                            | 0.24       | 0.42       | 0.66       | 0.81          |
| no CTAB           | 56 $\pm$ 3                      | 38 $\pm$ 2 | 47 $\pm$ 3 | 97 $\pm$ 2 | 431 $\pm$ 25  |
| CTAB<br>1.37 mM   | 16 $\pm$ 2                      | 11 $\pm$ 1 | 14 $\pm$ 3 | 29 $\pm$ 1 | 249 $\pm$ 107 |
| CTAB<br>2.74 mM   | 16 $\pm$ 1                      | 6 $\pm$ 1  | 9 $\pm$ 1  | 30 $\pm$ 1 | 165 $\pm$ 7   |
| CTAB<br>4.12 mM   | 15 $\pm$ 1                      | 4 $\pm$ 1  | 6 $\pm$ 1  | 27 $\pm$ 3 | 15 $\pm$ 7    |
| CTAB<br>5.90 mM   | 14 $\pm$ 3                      | 4 $\pm$ 1  | 7 $\pm$ 1  | 19 $\pm$ 1 | 136 $\pm$ 7   |

  

| 2,4,5-T<br>(on NIP) | Molar fraction of MeCN in water |            |             |             |             |
|---------------------|---------------------------------|------------|-------------|-------------|-------------|
|                     | 0.00                            | 0.24       | 0.42        | 0.66        | 0.81        |
| no CTAB             | 39 $\pm$ 7                      | 14 $\pm$ 3 | 25 $\pm$ 12 | 101 $\pm$ 8 | 398 $\pm$ 7 |
| CTAB<br>1.37 mM     | 5 $\pm$ 2                       | 4 $\pm$ 3  | 5 $\pm$ 2   | 22 $\pm$ 2  | 102 $\pm$ 6 |
| CTAB<br>2.74 mM     | 4 $\pm$ 1                       | 2 $\pm$ 1  | 3 $\pm$ 1   | 17 $\pm$ 2  | 88 $\pm$ 1  |
| CTAB<br>4.12 mM     | 4 $\pm$ 1                       | 1 $\pm$ 1  | 2 $\pm$ 2   | 13 $\pm$ 1  | 81 $\pm$ 20 |
| CTAB<br>5.90 mM     | 3 $\pm$ 1                       | 1 $\pm$ 1  | 1 $\pm$ 1   | 14 $\pm$ 2  | 76 $\pm$ 1  |
